# Supplementary material
Source: publisher figshare collection journal article supplement (https://gsapubs.figshare.com/ndownloader/files/22397751)

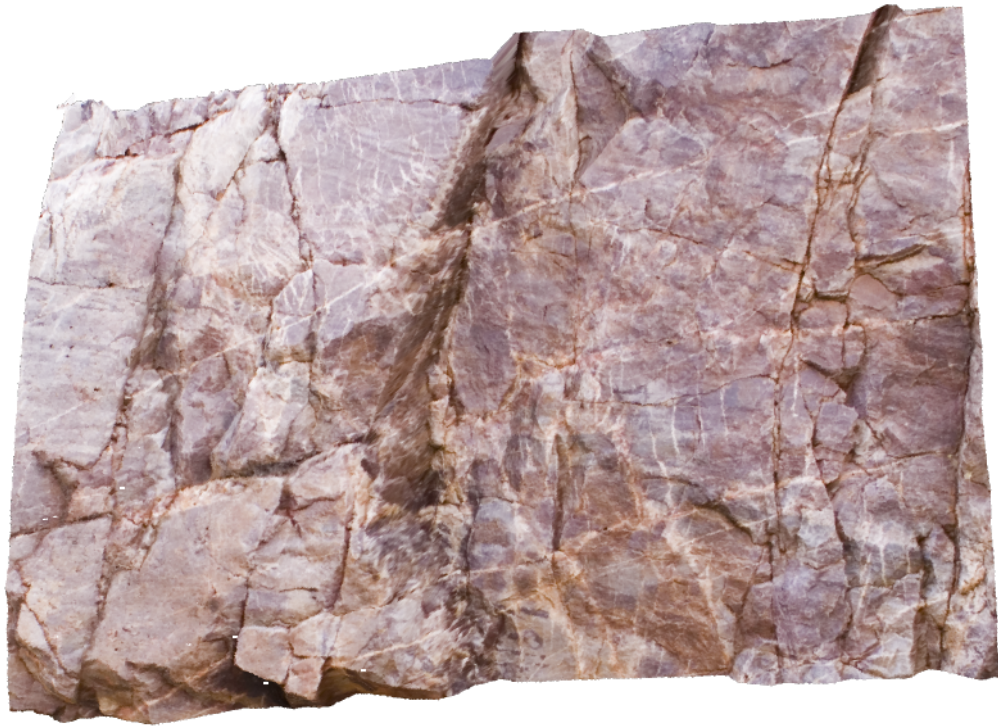

Baker et al., Figure 5 Supplement

Supplement: Supplementary file 1 [file 22397751]
